# Supplementary material
Source: PubMed Central journal article supplement (PMC6643836)
Supplement: ao8b02478_si_001.pdf [file ao8b02478_si_001.pdf]

## **SUPPORTING INFORMATION**

### **Development of Organo-Dispersible Graphene Oxide *via* Pseudo-Surface Modification for Thermally Conductive Green Polymer Composites**

*Siewteng Sim<sup>1</sup>, Yoshito Andou<sup>1\*</sup>, Hamra A. A. Bashid<sup>2</sup>, Hongnee Lim<sup>2</sup>, Mohammednoor Altarawneh<sup>3</sup>, Zhongtao Jiang<sup>3</sup>, Kubra Eksiler<sup>1</sup>, Satoshi Iikubo<sup>1</sup>*

<sup>1</sup> Department of Biological Functions Engineering, Graduate School of Life Science and Systems Engineering, Kyushu Institute of Technology, 2-4 Hibikino, Wakamatsu-ku, Kitakyushu, Fukuoka, 808-0196, Japan

<sup>2</sup> Department of Chemistry, Faculty of Science, Universiti Putra Malaysia, 43400 UPM Serdang, Selangor, Malaysia

<sup>3</sup> School of Engineering and Information Technology, Murdoch University, 90 South Street, Murdoch Western Australia, 6150, Australia

\*Corresponding author:

Yoshito Andou, Department of Biological Functions and Engineering, Graduate School of Life Science and Systems Engineering, Kyushu Institute of Technology, 2-4 Hibikino, Wakamatsu-ku, Kitakyushu, Fukuoka 808-0196, Japan

E-mail address: [yando@life.kyutech.ac.jp](mailto:yando@life.kyutech.ac.jp)

KEYWORDS: Graphene oxide; polycaprolactone; ring opening polymerization; density functional theory; dispersion; thermal conductivity, green electronics

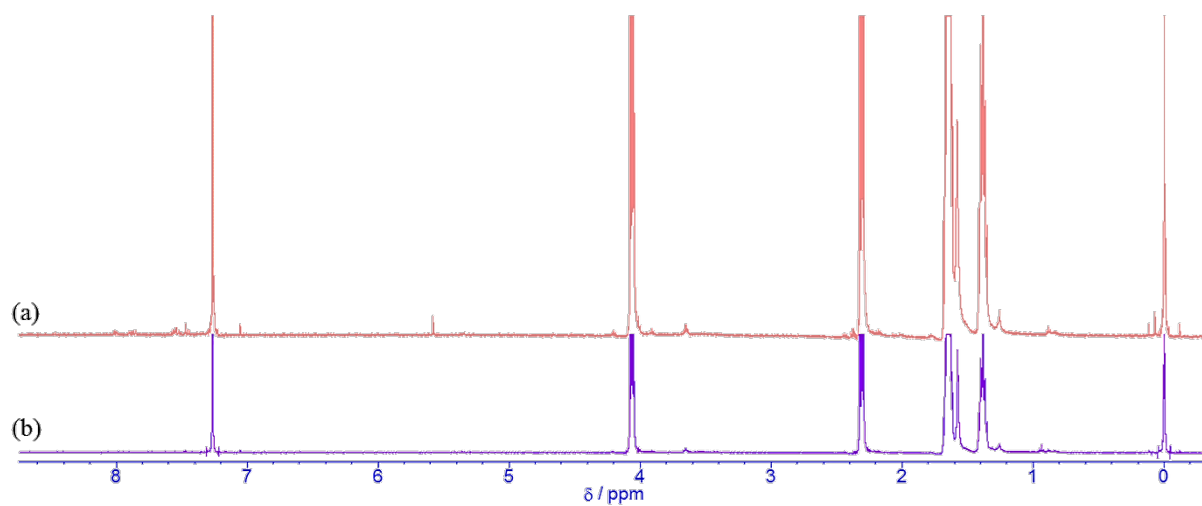

**Figure S 1.** The  $^1\text{H}$ -NMR spectra for PCL (a) with 1-NM, and (b) with butanol.

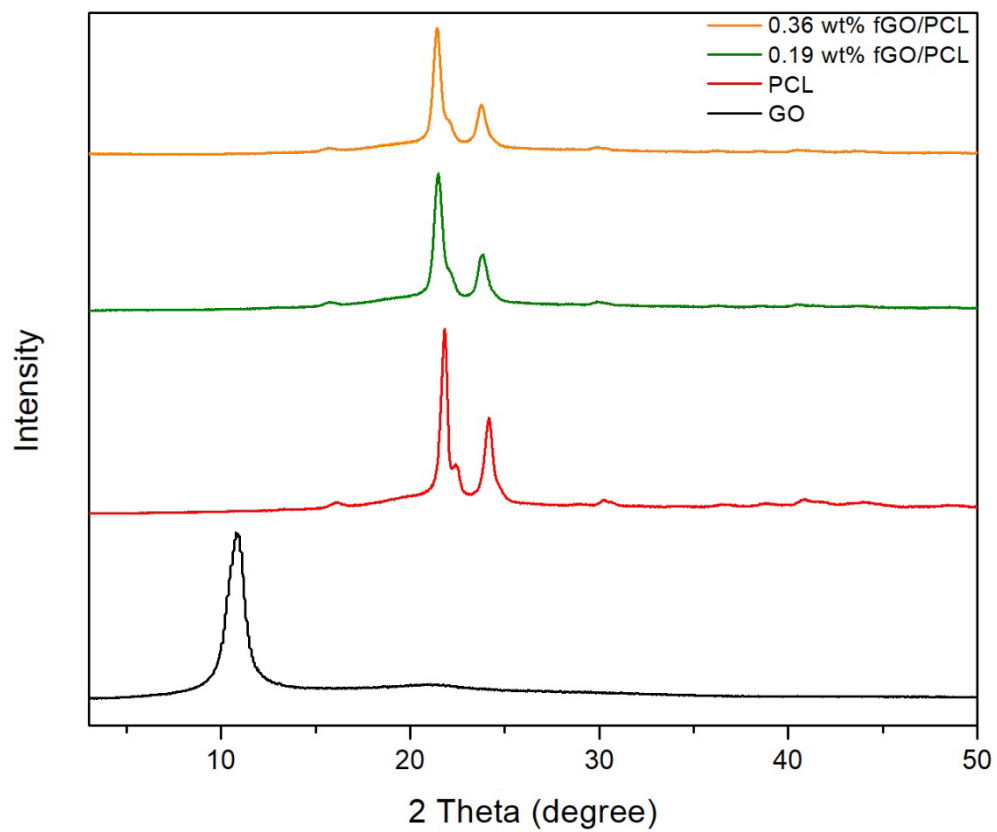

**Figure S 2.** The WAXD patterns of GO, PCL and fGO/PCL nanocomposites.

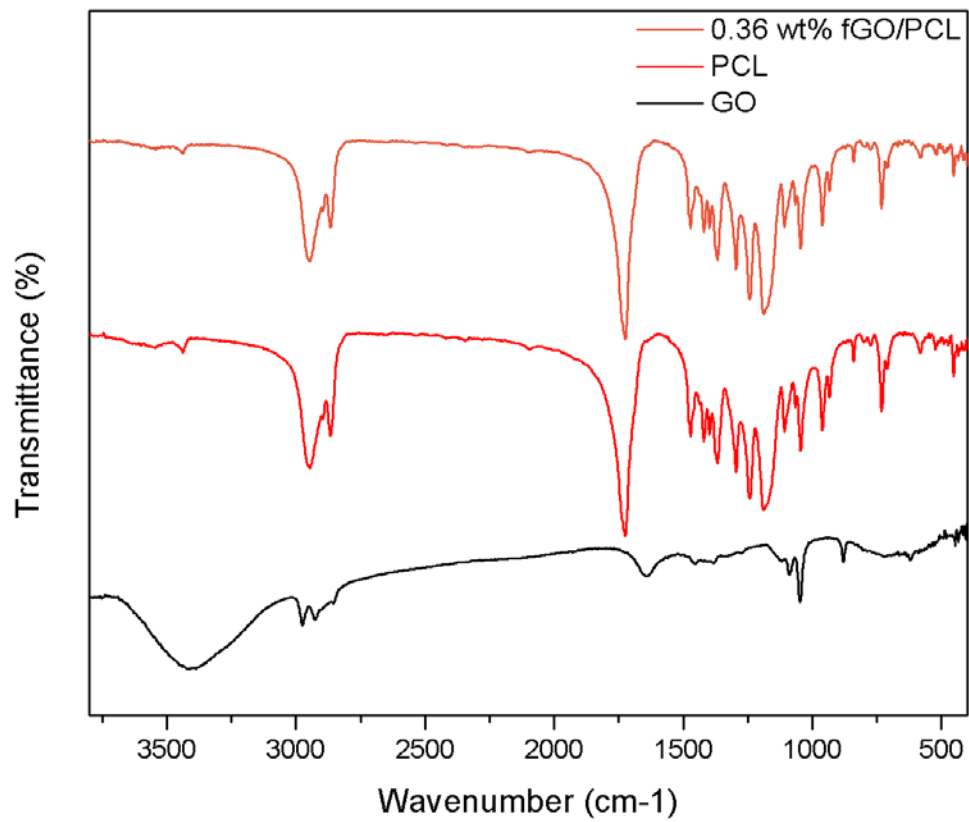

**Figure S 3.** FTIR spectra of GO, PCL and fGO/PCL nanocomposite.

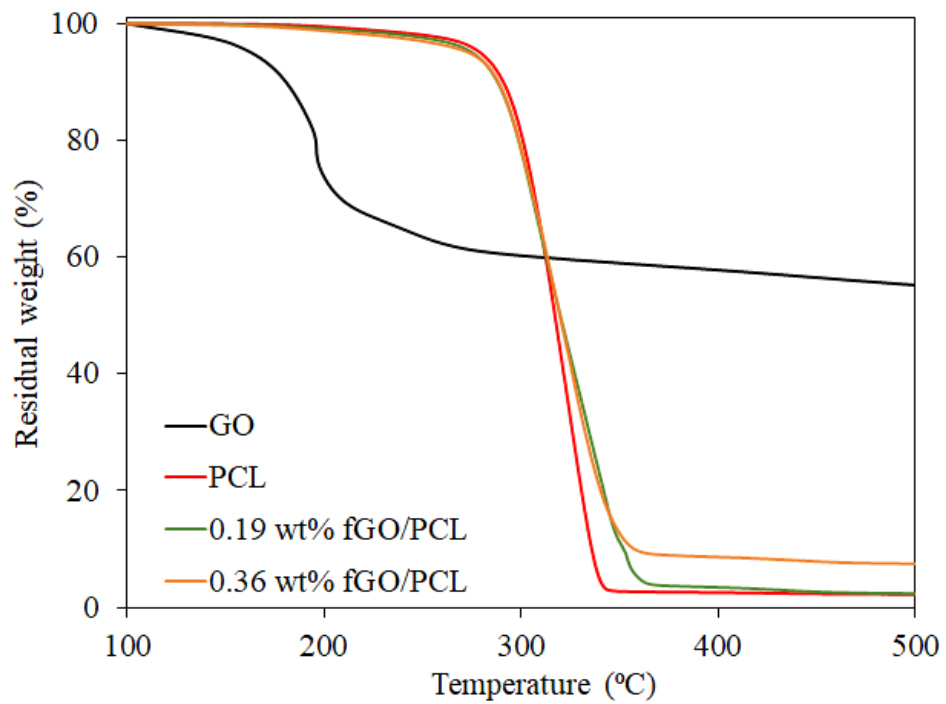

**Figure S 4.** TG curves for GO, PCL and fGO/PCL nanocomposites.

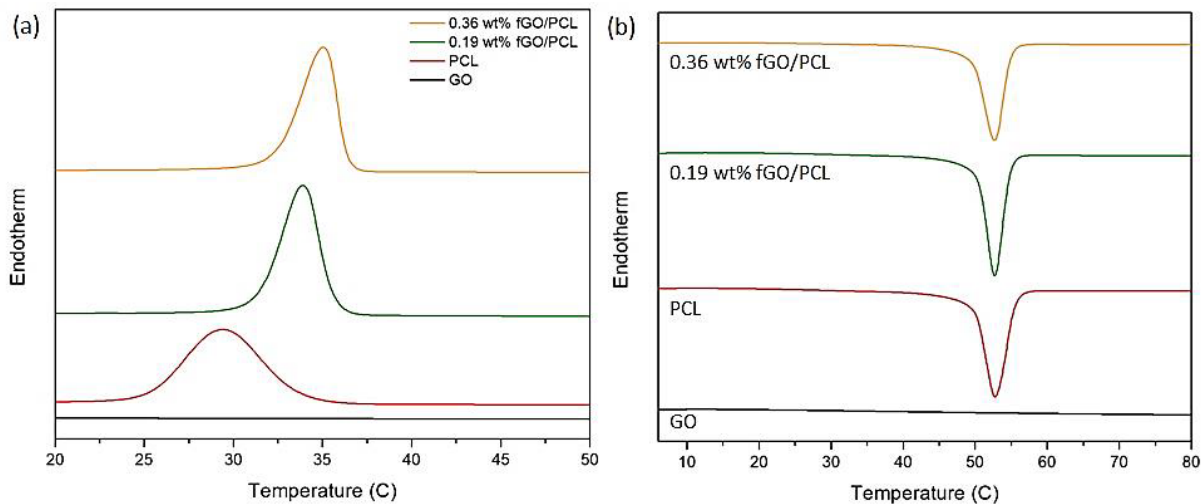

**Figure S 5.** DSC curves for GO, PCL and fGO/PCL nanocomposites during (a) the cooling scan and (b) the second heating scan.

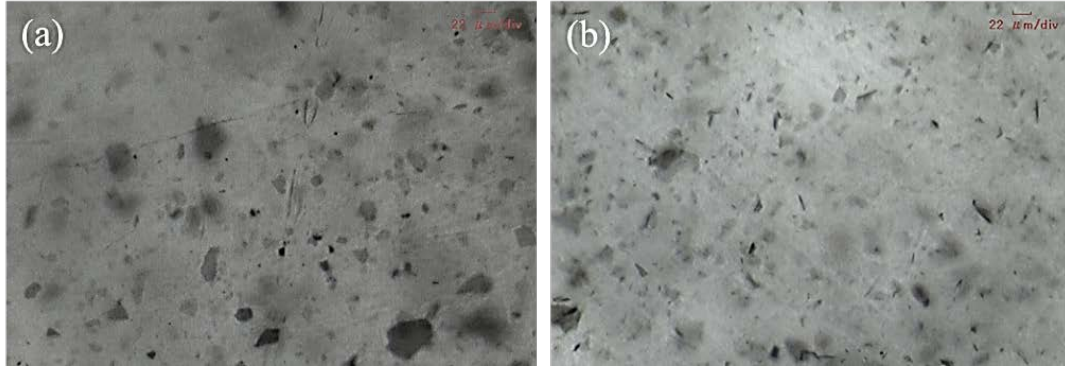

**Figure S 6.** Optical images of green polymer composites, (a) (0.37 wt% fGO/PCL\*)-PCL and (b) (0.37 wt% fGO/PCL\*)-PHB with magnification of 2,000.
